# Supplementary material for: Single-neuron dynamical effects of dendritic pruning implicated in aging and neurodegeneration: towards a measure of neuronal reserve
Source: PubMed Central journal article supplement (PMC7809359; doi:10.1038/s41598-020-78815-z), 2021-01-14
Supplement: 41598_2020_78815_MOESM1_ESM.pdf [file 41598_2020_78815_MOESM1_ESM.pdf]

# Single-neuron dynamical effects of dendritic pruning implicated in aging and neurodegeneration: Towards a measure of neuronal reserve

Christoph Kirch<sup>1,2</sup>, Leonardo L. Gollo<sup>1,2,3</sup>

<sup>1</sup>QIMR Berghofer Medical Research Institute, Brisbane, Australia

<sup>2</sup>The Queensland University of Technology, Brisbane, Australia

<sup>3</sup>Monash University, Melbourne, Australia

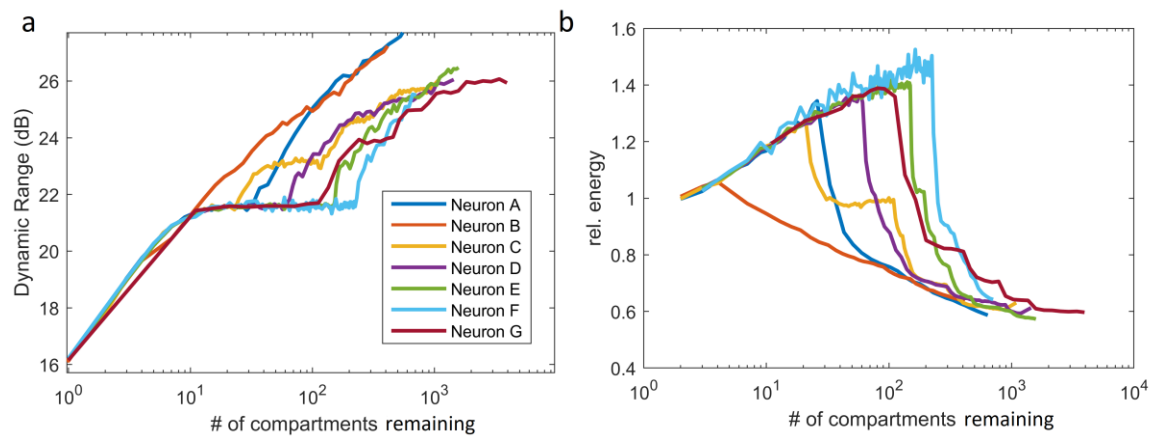

**Supplementary Figure 1: Convergence of dynamics with neuronal pruning.** The number of compartments reduces as pruning accumulates. (a) Dynamic range versus the number of compartments remaining. (b) Relative energy consumption versus the number of compartments remaining.
